# Supplementary material for: Synthesis of a novel hexaazatriphenylene derivative for the selective detection of copper ions in aqueous solution
Source: Royal Society of Chemistry journal article supplement (doi:10.1039/c9ra08825c), 2019-01-01
Supplement: c9ra08825c1.pdf [file c9ra08825c1.pdf]

**Fig. S1.** (a) Mass spectrum of NQH and NQH-Cu<sup>2+</sup>.

**Fig. S2.** The EIS response of NQH in presence of different metal ions.

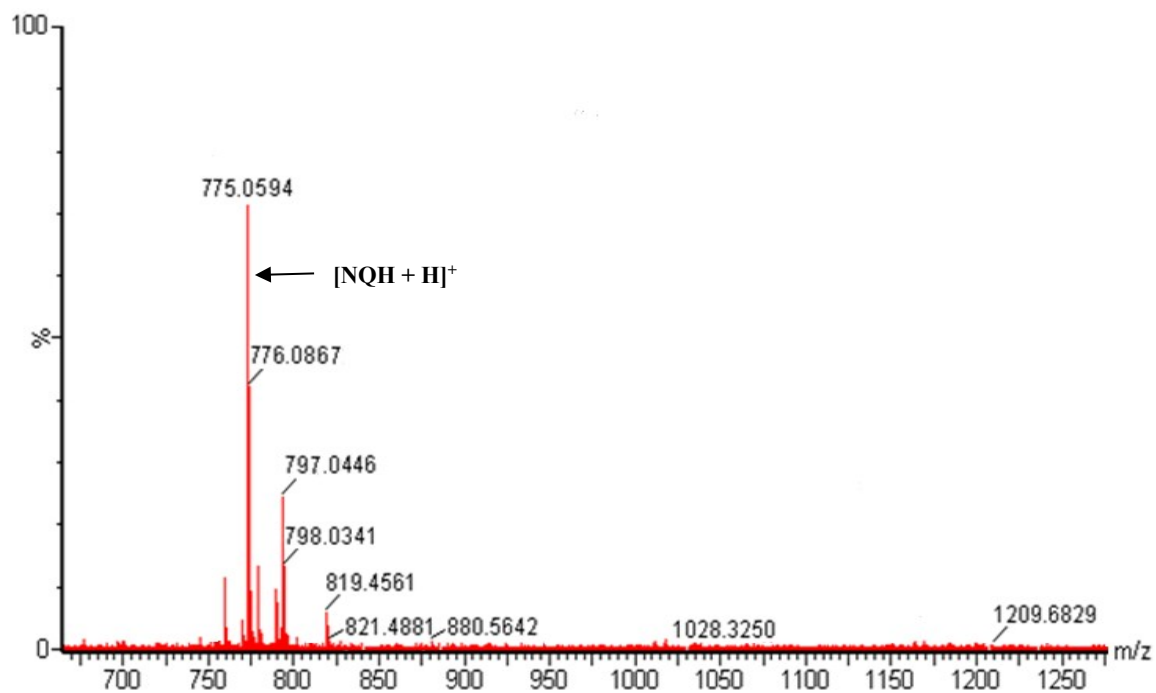

(a)

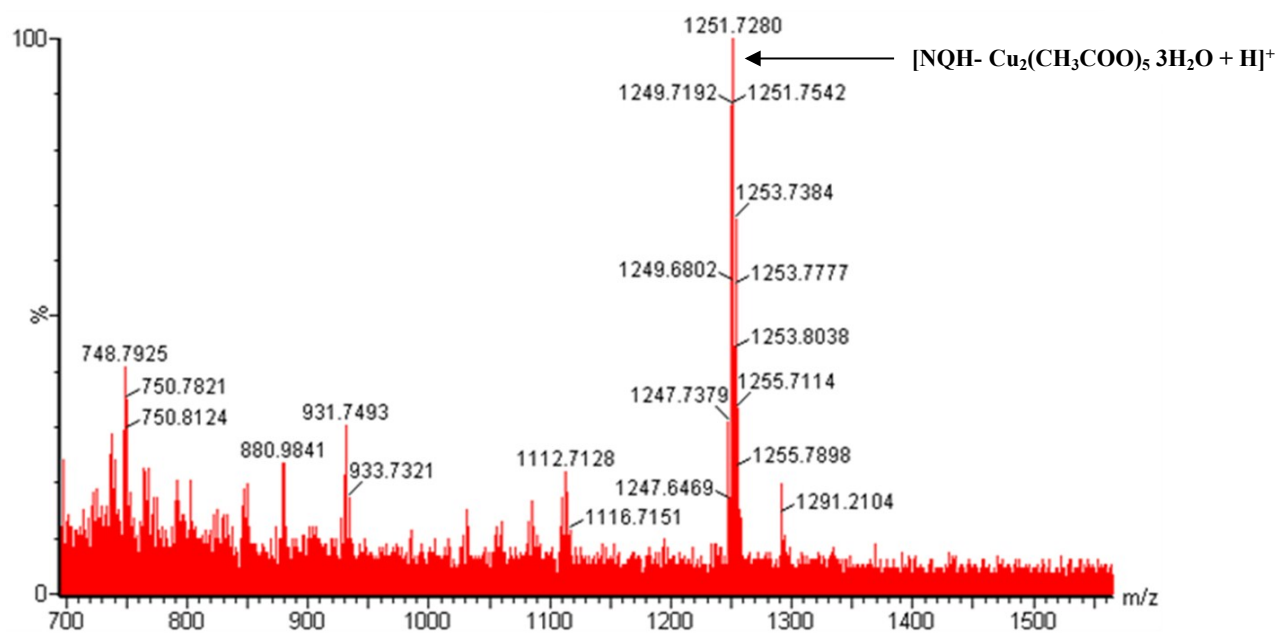

(b)

Figure S1

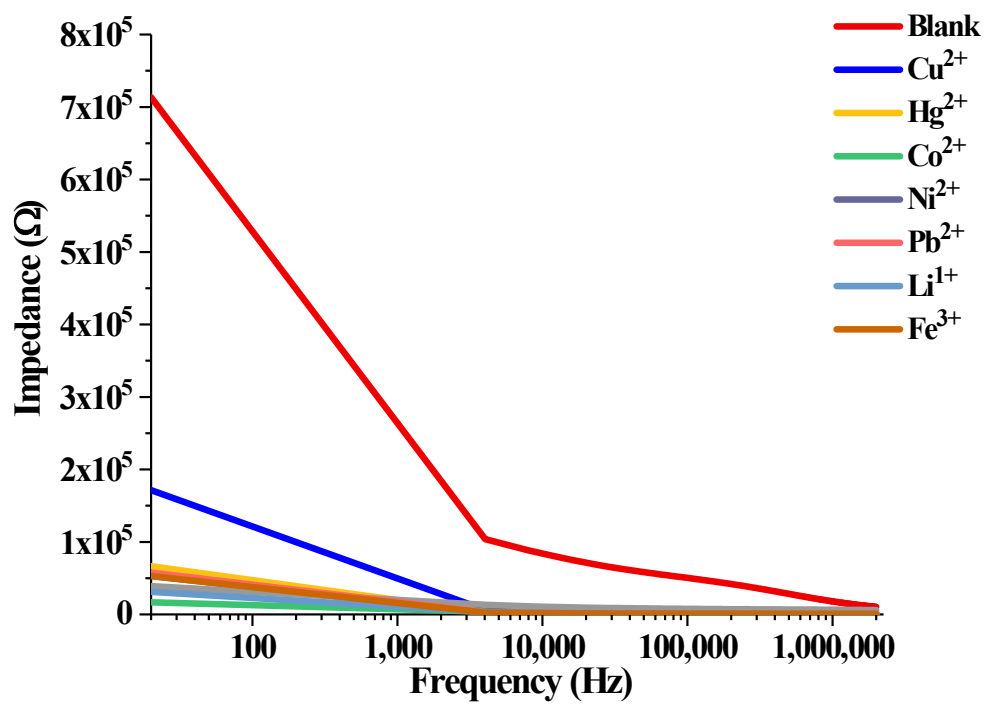

Figure S2
